# Supplementary material for: Vestigial-like 3 is an inhibitor of adipocyte differentiation
Source: PubMed Central journal article supplement — J Lipid Res. 2013 Feb;54(2):473–81. doi: 10.1194/jlr.M032755 (PMC3541706; doi:10.1194/jlr.m032755), 2013-02

## Supplementary Figure Legends

**Figure S1.** 3T3-F442A subline isolation strategy. FBS = Fetal Bovine Serum. CS = Calf Serum. Insulin was used at 5  $\mu\text{g}/\text{mL}$ .

**Figure S2.** Heat map depicting differentially regulated genes identified in isolated sublines of 3T3-F442A pre-adipocytes using whole mouse genome arrays. Cells were grown in 10% FBS with insulin (5  $\mu\text{g}/\text{mL}$ ). RNA was isolated 48 h post-confluence.

**Figure S3.** Correlation of mouse adipose Vgl13 mRNA expression with total fat, mesenteric, retroperitoneal, and subcutaneous fat content. N  $\sim$ 300 (16).

**Figure S4.** Analysis of the activation of -5.4 kB aP2 promoter co-expressing PPAR $\gamma$ 2/RXR and Vgl13 in undifferentiated 3T3-L1 pre-adipocytes in 10% FBS with insulin (5  $\mu\text{g}/\text{mL}$ ) with or without PPAR $\gamma$  ligand GW7845 (100 nM). N=4.

**Figure S5.** Expression of osteogenic-associated genes in C310T1/2 cells overexpressing Vgl13 or pBABE control grown in 10% FBS +  $\beta$ -glycerophosphate (1M) + Ascorbic Acid (50 mg/mL) at Day 0 and Day 30. Gene expression was analyzed by real-time PCR and normalized to 36B4 control.

## 1. Picking Single Colonies

Incubation time:  
~ 72 hours

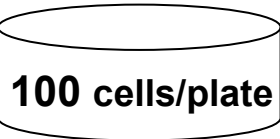

cloning discs

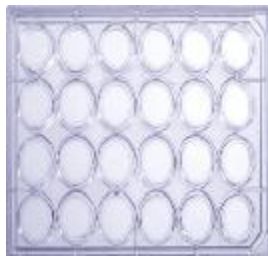

Grow each clone to  
~ 80% confluence in 10% CS  
~100 colonies picked.

## 2. Selecting Clones

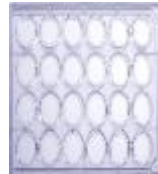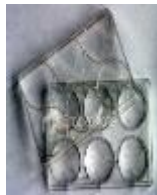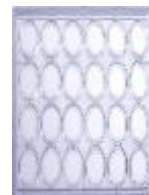

~60 clones grown to confluence in 10% Fetal Bovine Serum (FBS) +/- insulin for 8 days.

~60 clones grown to nearly confluence in 10% Calf Serum (CS).

## 3. Scoring and Initial Freezing

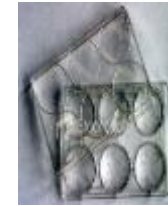

10% FBS

-Oil Red O stained; Day 8  
-sub-clones validated by PPAR $\gamma$ 2 & aP2 gene expression.

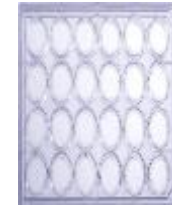

10% CS

Cell trypsinized and frozen down.  
All clones passed to small flasks.



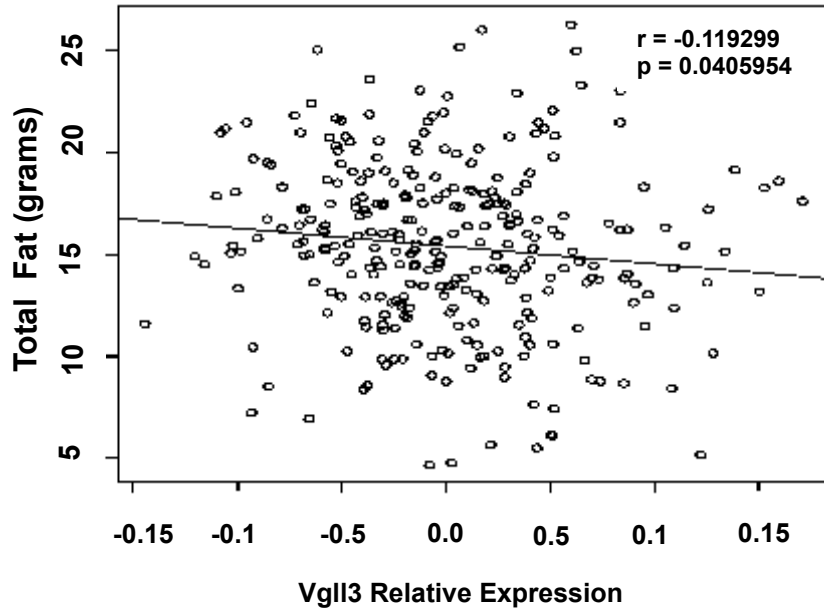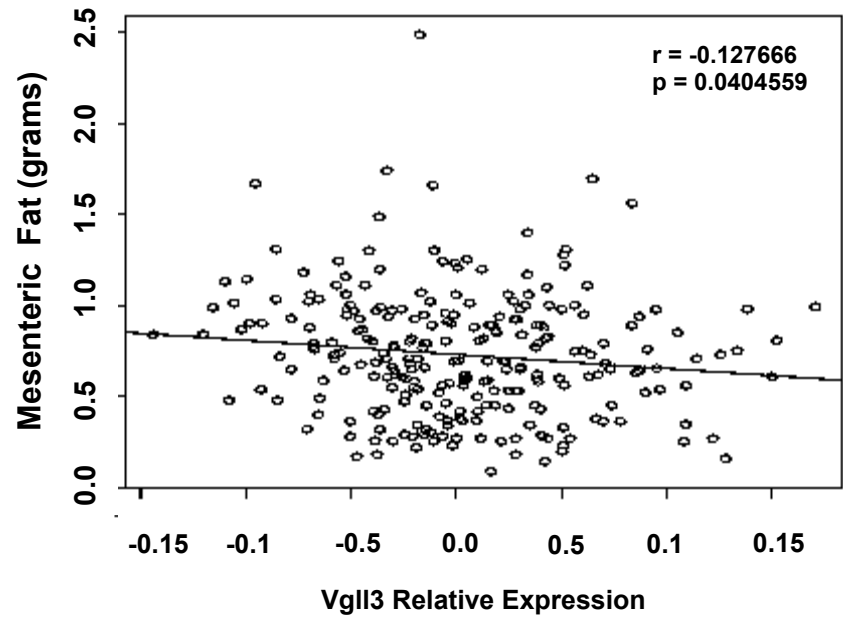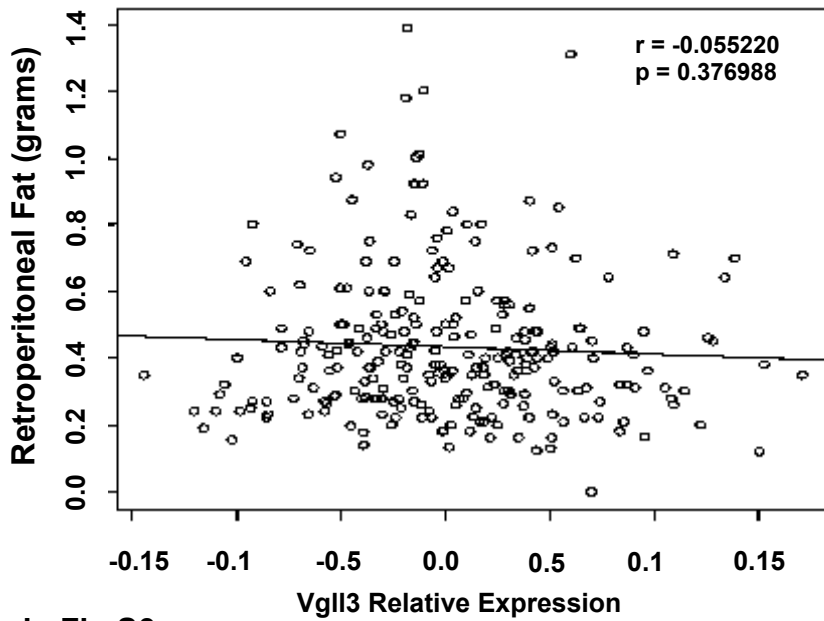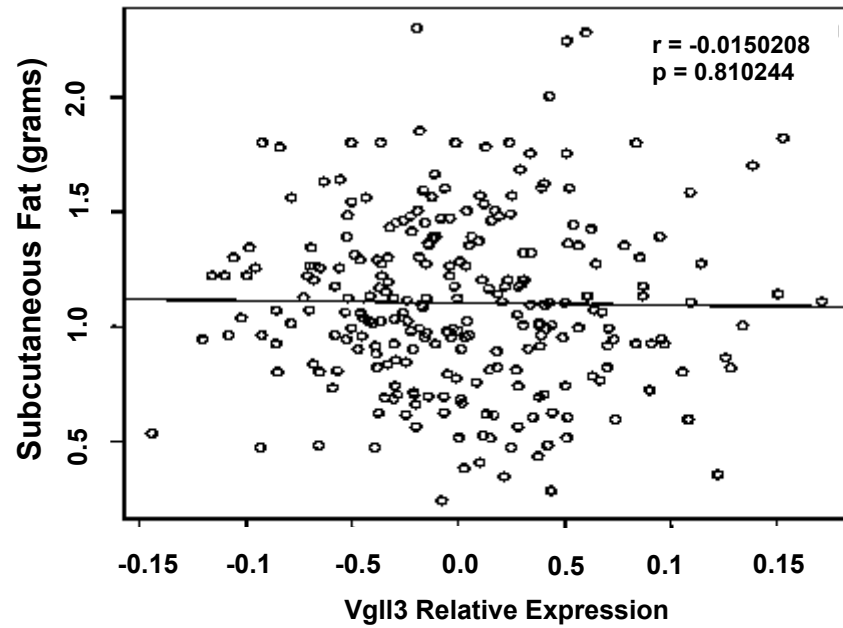

Halperin Fig.S3

5.4 Kb aP2 Promoter

Luciferase Reporter Gene

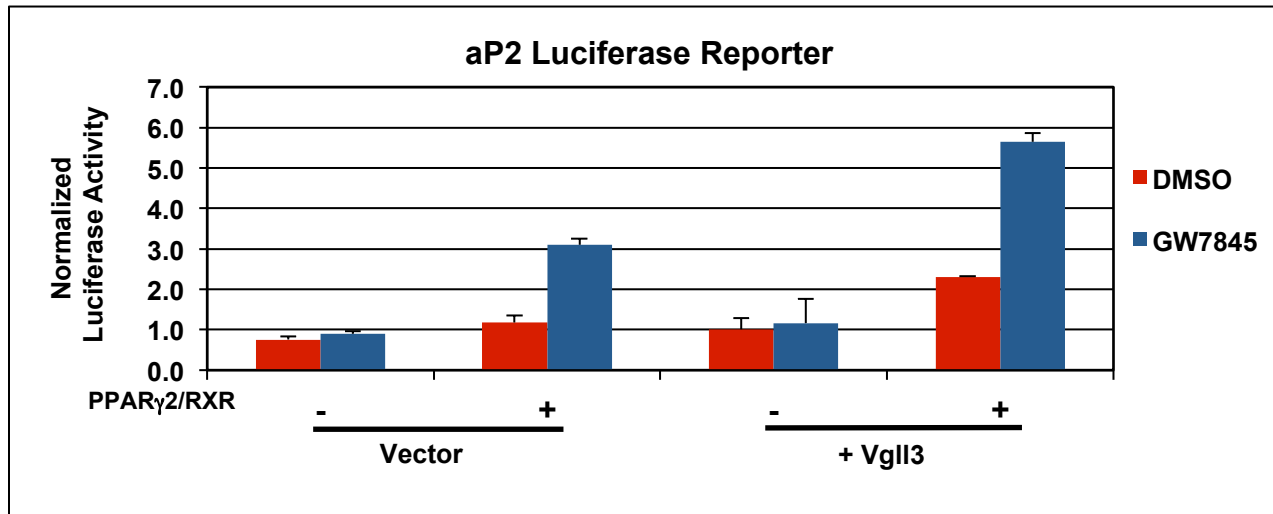

Halperin Fig.S4

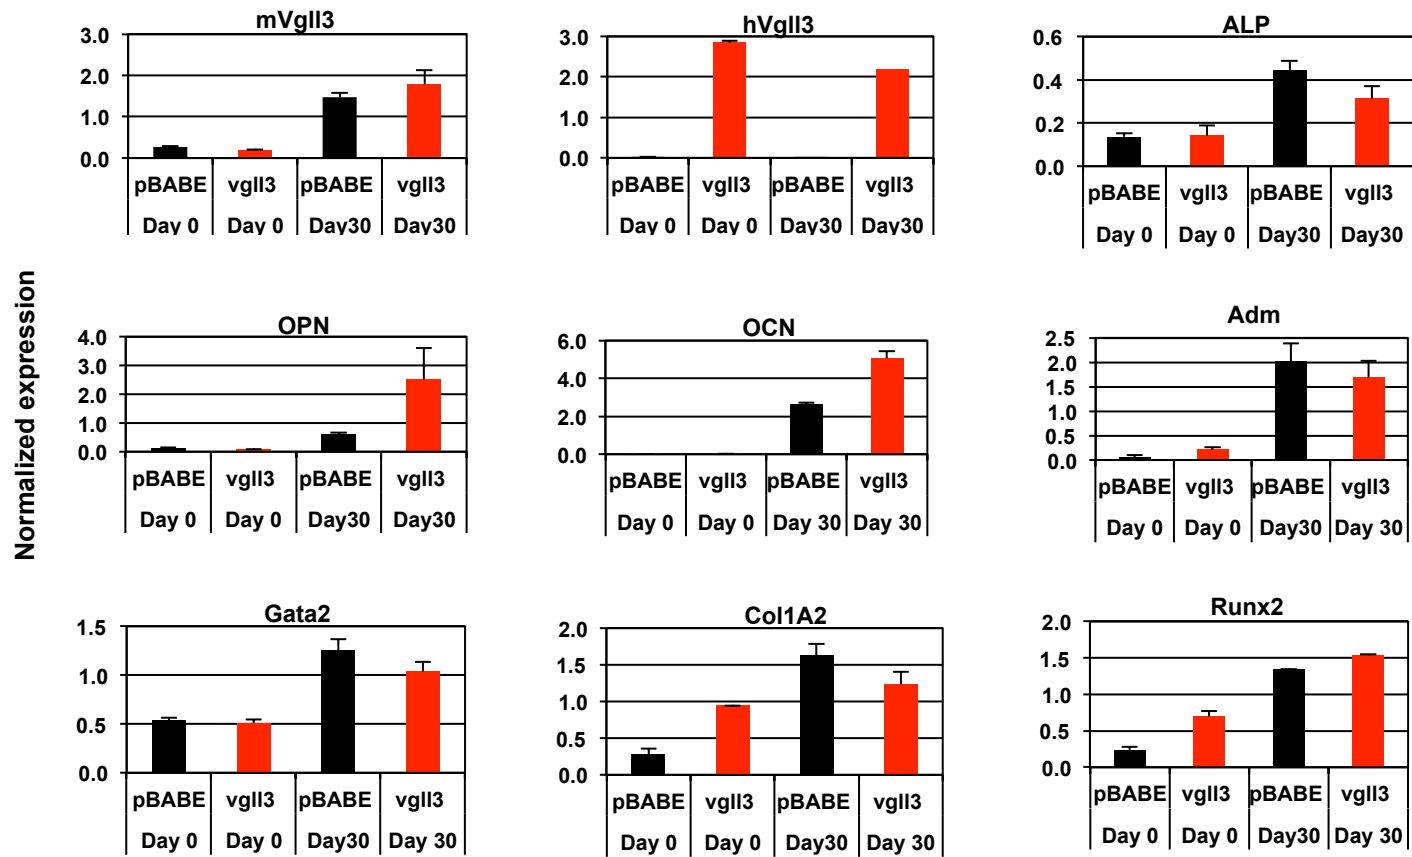

Supplement: supp_M032755_jlr.M032755-1.pdf [file supp_M032755_jlr.M032755-1.pdf]
